# Supplementary material for: The Role of Nutrition in Degenerative Cervical Myelopathy: A Systematic Review
Source: PubMed Central journal article supplement (PMC8558601; doi:10.1177/11786388211054664), 2021-10-30
Supplement: sj-pdf-2-nmi-10.1177_11786388211054664.pdf [file sj-pdf-2-nmi-10.1177_11786388211054664.pdf]

# S4. Appendix 4.

## Harvest Plot

This is a visual representation of the specific outcomes assessed in individual papers (refer to S5.Appendix 5 for bibliography).

# Understanding the harvest plot:

The information is displayed in the following format:

The variable being examined

The relationship between variable and outcome

| <b><i>Increased weight-adverse events</i></b> | <b>Negative correlation</b>                                                          | <b>No correlation</b>                                                                | <b>Positive correlation</b>                                                          |
|-----------------------------------------------|--------------------------------------------------------------------------------------|--------------------------------------------------------------------------------------|--------------------------------------------------------------------------------------|
| Post-operative complications                  |                                                                                      |                                                                                      |   |
| Re-admission                                  |  |  |  |

The outcome being examined

# Understanding the harvest plot:

- Each bar represents one paper.

- The number at the base of each bar is a reference to the paper in the bibliography (Appendix 5)

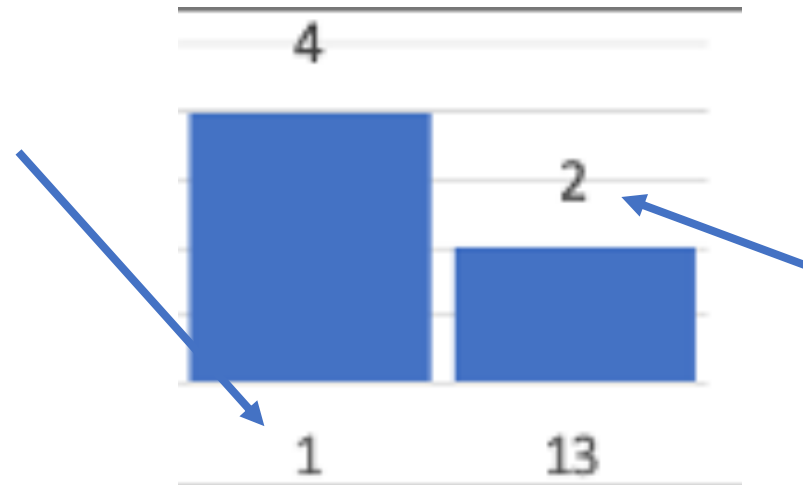

- The number at the top of the bar is the height.
- The height represents the quality of the paper based on if it was downgraded on any of 3 parameters: bias, imprecision, indirectness.

| Bias, Imprecision, Indirectness |        |
|---------------------------------|--------|
|                                 | Height |
| If not graded down              | 4      |
| If graded down on 1 parameter   | 3      |
| If graded down on 2 parameters  | 2      |
| If graded down on 3 parameters  | 1      |

# Understanding the harvest plot: Example

| <b><u>Increased BMI -spinal cord</u></b> | <b>Negative correlation</b>                                                                                         | <b>No correlation</b>                                                                                  | <b>Positive correlation</b> |
|------------------------------------------|---------------------------------------------------------------------------------------------------------------------|--------------------------------------------------------------------------------------------------------|-----------------------------|
| <b>Patient-reported outcomes</b>         |  <p>4 4 4 4</p> <p>1 10 16 21</p> |  <p>4</p> <p>13</p> |                             |

This row shows papers looking at the relationship between increased BMI and patient reported outcomes (under the spinal cord biology category):

- 4 papers showed a negative correlation between these two variables,
- 1 paper showed no correlation,
- 0 papers showed a positive correlation.

# S4. Appendix 4.

## Harvest Plot: Results

This is a visual representation of the specific outcomes assessed in individual papers (refer to S5.Appendix 5 for bibliography).

| <b><i>Increased BMI-adverse events</i></b> | <b>Negative correlation</b>                                                        | <b>No correlation</b>                                                               | <b>Positive correlation</b>                                                        |
|--------------------------------------------|------------------------------------------------------------------------------------|-------------------------------------------------------------------------------------|------------------------------------------------------------------------------------|
| Post-operative complications               | 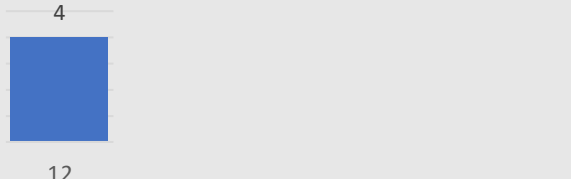  |   |  |
| Mortality                                  |  |  |                                                                                    |

| <b><i>Increased BMI -spinal cord biology</i></b> | <b>Negative correlation</b>                                                        | <b>No correlation</b>                                                               | <b>Positive correlation</b>                                                         |
|--------------------------------------------------|------------------------------------------------------------------------------------|-------------------------------------------------------------------------------------|-------------------------------------------------------------------------------------|
| Patient-reported outcomes                        |  |  |                                                                                     |
| Change in JOA score                              |                                                                                    |  |                                                                                     |
| Functional independence measure efficiency       |                                                                                    |                                                                                     |  |
| Reactive oxygen metabolites                      |                                                                                    |  |                                                                                     |

| <b><i>Increased BMI -spinal column biology</i></b> | <b>Negative correlation</b> | <b>No correlation</b>                                                                                | <b>Positive correlation</b>                                                                         |
|----------------------------------------------------|-----------------------------|------------------------------------------------------------------------------------------------------|-----------------------------------------------------------------------------------------------------|
| Cervical alignment parameters                      |                             |                                                                                                      | 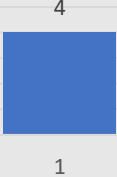 <p>4<br/>1</p>  |
| Modic changes                                      |                             |                                                                                                      |  <p>4<br/>15</p> |
| Loss of cervical lordosis                          |                             |  <p>4<br/>24</p>  |                                                                                                     |
| Adjacent segment disease                           |                             |  <p>4<br/>23</p>  |                                                                                                     |
| Risk of cervical spondylosis                       |                             |  <p>4<br/>20</p> |                                                                                                     |



| <b><u>Pre-operative weight loss-adverse events</u></b> | <b>Negative correlation</b> | <b>No correlation</b> | <b>Positive correlation</b>                                                                                                                                                                                                                                                                                                                                                                                                                                                                                                                                                                                                                                                                                                                                                                |                  |       |        |                      |    |   |                |   |   |                      |   |   |           |   |   |
|--------------------------------------------------------|-----------------------------|-----------------------|--------------------------------------------------------------------------------------------------------------------------------------------------------------------------------------------------------------------------------------------------------------------------------------------------------------------------------------------------------------------------------------------------------------------------------------------------------------------------------------------------------------------------------------------------------------------------------------------------------------------------------------------------------------------------------------------------------------------------------------------------------------------------------------------|------------------|-------|--------|----------------------|----|---|----------------|---|---|----------------------|---|---|-----------|---|---|
| Post-operative complications                           |                             |                       |  <p>A bar chart with four bars. The first bar (Negative correlation) has a count of 17 and a height of 4. The second bar (No correlation) has a count of 5 and a height of 3. The third bar (Positive correlation) has a count of 2 and a height of 4. The fourth bar (unlabeled) has a count of 4 and a height of 4.</p> <table border="1"> <thead> <tr> <th>Correlation Type</th> <th>Count</th> <th>Height</th> </tr> </thead> <tbody> <tr> <td>Negative correlation</td> <td>17</td> <td>4</td> </tr> <tr> <td>No correlation</td> <td>5</td> <td>3</td> </tr> <tr> <td>Positive correlation</td> <td>2</td> <td>4</td> </tr> <tr> <td>Unlabeled</td> <td>4</td> <td>4</td> </tr> </tbody> </table> | Correlation Type | Count | Height | Negative correlation | 17 | 4 | No correlation | 5 | 3 | Positive correlation | 2 | 4 | Unlabeled | 4 | 4 |
| Correlation Type                                       | Count                       | Height                |                                                                                                                                                                                                                                                                                                                                                                                                                                                                                                                                                                                                                                                                                                                                                                                            |                  |       |        |                      |    |   |                |   |   |                      |   |   |           |   |   |
| Negative correlation                                   | 17                          | 4                     |                                                                                                                                                                                                                                                                                                                                                                                                                                                                                                                                                                                                                                                                                                                                                                                            |                  |       |        |                      |    |   |                |   |   |                      |   |   |           |   |   |
| No correlation                                         | 5                           | 3                     |                                                                                                                                                                                                                                                                                                                                                                                                                                                                                                                                                                                                                                                                                                                                                                                            |                  |       |        |                      |    |   |                |   |   |                      |   |   |           |   |   |
| Positive correlation                                   | 2                           | 4                     |                                                                                                                                                                                                                                                                                                                                                                                                                                                                                                                                                                                                                                                                                                                                                                                            |                  |       |        |                      |    |   |                |   |   |                      |   |   |           |   |   |
| Unlabeled                                              | 4                           | 4                     |                                                                                                                                                                                                                                                                                                                                                                                                                                                                                                                                                                                                                                                                                                                                                                                            |                  |       |        |                      |    |   |                |   |   |                      |   |   |           |   |   |
| Mortality                                              |                             |                       |  <p>A bar chart with two bars. The first bar (Negative correlation) has a count of 17 and a height of 4. The second bar (No correlation) has a count of 5 and a height of 3.</p> <table border="1"> <thead> <tr> <th>Correlation Type</th> <th>Count</th> <th>Height</th> </tr> </thead> <tbody> <tr> <td>Negative correlation</td> <td>17</td> <td>4</td> </tr> <tr> <td>No correlation</td> <td>5</td> <td>3</td> </tr> </tbody> </table>                                                                                                                                                                                                                                                             | Correlation Type | Count | Height | Negative correlation | 17 | 4 | No correlation | 5 | 3 |                      |   |   |           |   |   |
| Correlation Type                                       | Count                       | Height                |                                                                                                                                                                                                                                                                                                                                                                                                                                                                                                                                                                                                                                                                                                                                                                                            |                  |       |        |                      |    |   |                |   |   |                      |   |   |           |   |   |
| Negative correlation                                   | 17                          | 4                     |                                                                                                                                                                                                                                                                                                                                                                                                                                                                                                                                                                                                                                                                                                                                                                                            |                  |       |        |                      |    |   |                |   |   |                      |   |   |           |   |   |
| No correlation                                         | 5                           | 3                     |                                                                                                                                                                                                                                                                                                                                                                                                                                                                                                                                                                                                                                                                                                                                                                                            |                  |       |        |                      |    |   |                |   |   |                      |   |   |           |   |   |

| <b><u>Malnutrition/electrolytes-<br/>Adverse events</u></b> | <b>Negative correlation</b> | <b>No correlation</b>                                                                                  | <b>Positive correlation</b>                                                                                                     |
|-------------------------------------------------------------|-----------------------------|--------------------------------------------------------------------------------------------------------|---------------------------------------------------------------------------------------------------------------------------------|
| Post-operative complications                                |                             |  <p>4</p> <p>34</p> |  <p>4 4 4 4 4 4</p> <p>27 29 30 28 26 32</p> |
| Time for fusion                                             |                             |                                                                                                        |  <p>4</p> <p>34</p>                          |

| <b><u>Malnutrition/electrolytes-<br/>Spinal cord biology</u></b> | <b>Negative correlation</b>                                                       | <b>No correlation</b> | <b>Positive correlation</b> |
|------------------------------------------------------------------|-----------------------------------------------------------------------------------|-----------------------|-----------------------------|
| Functional independence<br>measure efficiency                    | 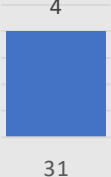 |                       |                             |
| Change in post-operative JOA<br>score (RCT)                      |  |                       |                             |

| <b><u>Vitamins/minerals-spinal cord biology</u></b> | <b>Negative correlation</b> | <b>No correlation</b> | <b>Positive correlation</b>                                                                         |
|-----------------------------------------------------|-----------------------------|-----------------------|-----------------------------------------------------------------------------------------------------|
| Upper extremity work capacity                       |                             |                       |  <p>4<br/>37</p> |
| Change in post-operative JOA score (RCT)            |                             |                       |  <p>4<br/>35</p> |
| Duration of spinal cord injury                      |                             |                       |  <p>4<br/>38</p> |

| <b><u>Vitamins/minerals-</u><br/><u>spinal column biology</u></b> | <b>Negative correlation</b>                                                                                                                                                                                                                                                      | <b>No correlation</b> | <b>Positive correlation</b> |
|-------------------------------------------------------------------|----------------------------------------------------------------------------------------------------------------------------------------------------------------------------------------------------------------------------------------------------------------------------------|-----------------------|-----------------------------|
| Risk of OPLL development                                          | 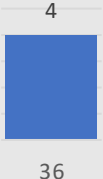 <p>A stacked bar chart with a blue top segment and a white bottom segment. The number '4' is positioned above the blue segment, and the number '36' is positioned below the white segment.</p> |                       |                             |

| <b><u>Gastrointestinal health-<br/>Adverse events</u></b> | <b>Negative correlation</b> | <b>No correlation</b> | <b>Positive correlation</b>                                                                                                                                                                                                                                                                                                                                                                                        |          |       |                      |   |                      |    |
|-----------------------------------------------------------|-----------------------------|-----------------------|--------------------------------------------------------------------------------------------------------------------------------------------------------------------------------------------------------------------------------------------------------------------------------------------------------------------------------------------------------------------------------------------------------------------|----------|-------|----------------------|---|----------------------|----|
| Post-operative complications                              |                             |                       | 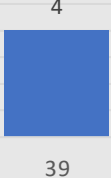 <p>A stacked bar chart with a total height of 43. The top segment is labeled '4' and the bottom segment is labeled '39'.</p> <table border="1"><thead><tr><th>Category</th><th>Count</th></tr></thead><tbody><tr><td>Negative correlation</td><td>4</td></tr><tr><td>Positive correlation</td><td>39</td></tr></tbody></table> | Category | Count | Negative correlation | 4 | Positive correlation | 39 |
| Category                                                  | Count                       |                       |                                                                                                                                                                                                                                                                                                                                                                                                                    |          |       |                      |   |                      |    |
| Negative correlation                                      | 4                           |                       |                                                                                                                                                                                                                                                                                                                                                                                                                    |          |       |                      |   |                      |    |
| Positive correlation                                      | 39                          |                       |                                                                                                                                                                                                                                                                                                                                                                                                                    |          |       |                      |   |                      |    |

| <b><u>Gastrointestinal health-</u></b><br><b><u>Spinal cord biology</u></b> | Negative correlation                                                                                                                                                                                                                                                                                                      | No correlation                                                                                                                                                                                                                                                            | Positive correlation |
|-----------------------------------------------------------------------------|---------------------------------------------------------------------------------------------------------------------------------------------------------------------------------------------------------------------------------------------------------------------------------------------------------------------------|---------------------------------------------------------------------------------------------------------------------------------------------------------------------------------------------------------------------------------------------------------------------------|----------------------|
| Patient-reported outcomes                                                   |  <p>A bar chart with two blue bars. The left bar has the value '41' written below it, and the right bar has the value '40' written below it. A horizontal bracket spans the top of both bars, with the number '4' centered above it.</p> |                                                                                                                                                                                                                                                                           |                      |
| Change in post-operative JOA score                                          |                                                                                                                                                                                                                                                                                                                           |  <p>A bar chart with a single blue bar. The value '40' is written below the bar. A horizontal bracket is positioned above the bar, with the number '4' centered above the bracket.</p> |                      |
